# 1 Evolution of Endothelin signaling and diversification of 2 adult pigment pattern in *Danio* fishes

3

4

5

6 **Jessica E. Spiewak<sup>1†</sup>, Emily J. Bain<sup>1,2</sup>, Jin Liu<sup>2</sup>, Kellie Kou<sup>1</sup>, Samantha L. Sturiale<sup>2</sup>,**  
7 **Larissa B. Patterson<sup>1‡</sup>, Parham Diba<sup>3§</sup>, Judith S. Eisen<sup>3</sup>, Ingo Braasch<sup>4</sup>, Julia**  
8 **Ganz<sup>4</sup>, David M. Parichy<sup>2\*</sup>**

9

10

11

12 <sup>1</sup> Department of Biology, University of Washington, Seattle WA 98195

13 <sup>2</sup> Department of Biology and Department of Cell Biology, University of Virginia, Charlottesville  
14 VA 22903

15 <sup>3</sup> Institute of Neuroscience, University of Oregon, Eugene OR 97403

16 <sup>4</sup> Department of Integrative Biology, Michigan State University, East Lansing MI 48823

17

18

19

20

21

22

23 \* E-mail: [dparichy@virginia.edu](mailto:dparichy@virginia.edu)

24

25 † Current affiliation: Graduate Program in Genetic Counseling, School of Medicine, University of  
26 California Irvine, Anaheim CA 92806

27 ‡ Current affiliation: Department of Biology, Rhode Island College, Providence RI 02908

28 § Current affiliation: Department of Pediatrics, Oregon Health & Science University, Portland,  
29 OR 97239

30

## 31 **Abstract**

32 Fishes of the genus *Danio* exhibit diverse pigment patterns that serve as useful models for  
33 understanding the genes and cell behaviors underlying the evolution of adult form. Among these  
34 species, zebrafish *D. rerio* exhibit several dark stripes of melanophores with sparse iridophores  
35 that alternate with light interstripes of dense iridophores and xanthophores. By contrast, the  
36 closely related species *D. nigrofasciatus* has an attenuated pattern with fewer melanophores,  
37 stripes and interstripes. Here we demonstrate species differences in iridophore development  
38 that presage the fully formed patterns. Using genetic and transgenic approaches we identify the  
39 secreted peptide Endothelin-3 (Edn3)—a known melanogenic factor of tetrapods—as  
40 contributing to reduced iridophore proliferation and fewer stripes and interstripes in *D.*  
41 *nigrofasciatus*. We further show the locus encoding this factor is expressed at lower levels in *D.*  
42 *nigrofasciatus* owing to *cis*-regulatory differences between species. Finally, we show that  
43 functions of two paralogous loci encoding Edn3 have been partitioned between skin and non-  
44 skin iridophores. Our findings reveal genetic and cellular mechanisms contributing to pattern  
45 differences between these species and suggest a model for evolutionary changes in Edn3  
46 requirements across vertebrates.

## 47 48 **Author Summary**

49 Neural crest derived pigment cells generate the spectacular variation in skin pigment patterns  
50 among vertebrates. Mammals and birds have just a single skin pigment cell, the melanocyte,  
51 whereas ectothermic vertebrates have several pigment cells including melanophores,  
52 iridophores and xanthophores, that together organize into a diverse array of patterns. In the  
53 teleost zebrafish, *Danio rerio*, an adult pattern of stripes depends on interactions between  
54 pigment cell classes and between pigment cells and their tissue environment. The close  
55 relative, *D. nigrofasciatus* has fewer stripes and prior analyses suggested a difference between  
56 these species that lies extrinsic to the pigment cells themselves. A candidate for mediating this  
57 difference is Endothelin-3 (Edn3), essential for melanocyte development in warm-blooded  
58 animals, and required by all three classes of pigment cells in an amphibian. We show that Edn3  
59 specifically promotes iridophore development in *Danio*, and that differences in Edn3 expression  
60 contribute to differences in iridophore complements, and striping, between *D. rerio* and *D.*  
61 *nigrofasciatus*. Our study reveals a novel function for Edn3 and provides new insights into how  
62 changes in gene expression yield morphogenetic outcomes to effect diversification of adult  
63 form.

## 64 Introduction

65 Mechanisms underlying species differences in adult form remain poorly understood.  
66 Quantitative genetic analyses and association studies have made progress in identifying loci,  
67 and even specific nucleotides, that contribute to morphological differences between closely  
68 related species and strains. Yet it remains often mysterious how allelic effects are translated  
69 into specific cellular outcomes of differentiation and morphogenesis to influence phenotype.  
70 Elucidating not only the genes but also the cellular behaviors underlying adult morphology and  
71 its diversification remains an outstanding challenge at the interface of evolutionary genetics and  
72 developmental biology.

73 To address genes and cellular outcomes in an evolutionary context requires a system amenable  
74 to modern methods of developmental genetic analysis and rich in phenotypic variation. Ideally  
75 the trait of interest would have behavioral or ecological implications, and its phenotype would be  
76 observable at a cellular level during development. In this context, adult pigment patterns of  
77 fishes in the genus *Danio* provide a valuable opportunity to interrogate genetic differences and  
78 the phenotypic consequences of these differences.

79 *Danio* fishes exhibit adult pigment patterns that include horizontal stripes, vertical bars, dark  
80 spots, light spots, uniform patterns and irregularly mottled patterns [1]. Pattern variation affects  
81 shoaling and might plausibly impact mate recognition, mate choice, and susceptibility to  
82 predation [2-5]. Phylogenetic relationships among species and subspecies are increasingly well  
83 understood, as is their biogeography, and some progress has been made towards elucidating  
84 their natural history [1,6-9]. Importantly in a developmental genetic context, one of these  
85 species, zebrafish *D. rerio*, is a well-established biomedical model organism with the genetic,  
86 genomic and cell biological tools that accompany this status. Such tools can be deployed in  
87 other danios to understand phenotypic diversification.

88 Adult pigment pattern formation in *D. rerio* is becoming well described in part because cellular  
89 behaviors can be observed directly in both wild-type and genetically manipulated backgrounds.  
90 The adult pigment pattern comprises three major classes of pigment cells—black  
91 melanophores, iridescent iridophores and yellow–orange xanthophores—all of which are  
92 derived directly or indirectly from embryonic neural crest cells [10,11]. The fully formed pattern  
93 consists of dark stripes of melanophores and sparse iridophores that alternate with light  
94 “interstripes” of xanthophores and dense iridophores (Figure 1, top). During a larva-to-adult  
95 transformation, precursors to adult iridophores and melanophores migrate to the skin from  
96 locations in the peripheral nervous system [10,12,13]. Once they reach the skin hypodermis,  
97 between the epidermis and the underlying myotome, the cells differentiate. Iridophores arrive  
98 first and establish a “primary” interstripe near the horizontal myoseptum [14-16]. Differentiating  
99 melanophores then form primary stripes dorsal and ventral to the interstripe, with their positions  
100 determined in part by interactions with iridophores. Later, xanthophores differentiate within the  
101 interstripe and these cells, as well as undifferentiated xanthophores, interact with melanophores  
102 to fully consolidate the stripe pattern [11,17-22]. As the fish grows, the pattern is reiterated:  
103 loosely arranged iridophores appear within stripes and expand into “secondary” interstripes  
104 where they increase in number and establish boundaries for the next forming secondary stripe  
105 [13,23]. Stripe development in *D. rerio* thus depends on serially repeated interactions among  
106 pigment cell classes. It also depends on factors in the tissue environment that are essential to  
107 regulating when and where pigment cells of each class appear [11,16].

108 Analyses of pattern development in other *Danio* are beginning to illuminate how pigment-cell  
109 “intrinsic” and “extrinsic” factors have influenced pattern evolution and the genetic bases for  
110 such differences [11,21,23-25]. Here, we extend these studies by examining pattern formation in  
111 *D. nigrofasciatus* (Figure 1, bottom). *D. rerio* and *D. nigrofasciatus* are closely related and occur  
112 within the “*D. rerio* species group” [9]. The essential elements of their patterns—stripes and  
113 interstripes—and the cell types comprising these patterns are the same. Nevertheless, *D.*  
114 *nigrofasciatus* has a smaller complement of adult melanophores than *D. rerio* and its stripes are  
115 fewer in number, with only residual spots where a secondary ventral stripe would form in *D.*  
116 *rerio*. Given the broader distribution of patterns and melanophores complements across *Danio*,  
117 the *D. nigrofasciatus* pattern of attenuated stripes is likely derived relative to that of *D. rerio* and  
118 other danios [26,27]. Cell transplantation analyses revealed that species differences in pattern  
119 result at least in part from evolutionary alterations residing in the extracellular environment that  
120 melanophores experience, rather than factors autonomous to the melanophores themselves.

121 In this study, we show that *D. rerio* and *D. nigrofasciatus* differ not only in melanophore  
122 complements but also iridophore behaviors. We show that iridophore development is curtailed in  
123 *D. nigrofasciatus*, with a corresponding loss of pattern reiteration. Using genetic and transgenic  
124 manipulations, we identify the endothelin pathway, and specifically the skin-secreted factor,  
125 Endothelin-3 (Edn3), as a candidate for mediating a species difference in iridophore  
126 proliferation. We find that *Danio* has two Edn3-encoding loci, arisen from an ancient genome  
127 duplication in the ancestor of teleost fishes [28,29], that have diverged in function to promote the  
128 development of different iridophore subclasses. One of these, *edn3b*, is required by hypodermal  
129 iridophores and has undergone *cis*-regulatory alteration resulting in diminished Edn3 expression  
130 in *D. nigrofasciatus*. Endothelin signaling is required directly by melanocytes in birds and  
131 mammals [30-33] but our findings indicate a specific role for Edn3b in promoting iridophore  
132 development, with only indirect effects on melanophores. These results suggest a model for the  
133 evolution of Edn3 function across vertebrates and implicate changes at a specific locus, *edn3b*,  
134 in altering cellular behavior that determines the numbers of stripes comprising adult pattern.

135

## 136 **Results**

### 137 **Different iridophore complements of *D. nigrofasciatus* and *D. rerio***

138 Iridophores are essential to stripe reiteration of *D. rerio* [23] and iridophore-deficient mutants  
139 have fewer melanophores [15,16,34]. Given the fewer stripes and melanophores of *D.*  
140 *nigrofasciatus* (Figure 2A) [27], we asked whether iridophore development differs in this species  
141 from *D. rerio*. Figure 2B (upper) illustrates ventral pattern development of *D. rerio*. Iridophores  
142 were confined initially to the primary interstripe but subsequently occurred as dispersed cells  
143 further ventrally [13,16,23]. Additional melanophores developed ventrally to form the ventral  
144 primary stripe. Dispersed iridophores were found amongst these melanophores and,  
145 subsequently, additional iridophores developed further ventrally as the ventral secondary  
146 interstripe. In *D. nigrofasciatus*, however, very few dispersed iridophores developed ventral to  
147 the primary interstripe (Figure 2B, lower). Melanophores of the prospective ventral primary  
148 stripe initially occurred further ventrally than in *D. rerio* (also see [27]), similar to mutants of *D.*  
149 *rerio* having iridophore defects [16]. Few iridophores were evident either within the prospective  
150 ventral primary stripe or further ventrally.

151 Iridophores arise from progenitors that are established in association with the peripheral  
152 nervous system. These cells migrate to the hypodermis where they differentiate [12]. Individual

153 progenitors can generate large hypodermal clones that expand during pattern formation [13]. To  
154 assess initial iridophore clone size and subsequent expansion we injected *D. rerio* and *D.*  
155 *nigrofasciatus* with limiting amounts of *pnp4a:palmeGFP* to drive membrane-targeted GFP in  
156 iridophores [21]. At transgene concentrations used, ~1% of injected embryos exhibited a single  
157 small patch of EGFP+ iridophores, consistent with labeling of individual progenitors [35,36].  
158 Iridophore morphologies and initial clone sizes were similar between species, but subsequent  
159 expansion was significantly greater in *D. rerio* than *D. nigrofasciatus* (Figure 2C; Figure S1).

160 These observations indicate that adult pattern differences between *D. rerio* and *D.*  
161 *nigrofasciatus* are presaged not only by differences in melanophore development [27] but  
162 changes in iridophore behavior as well. This raises the possibility that evolutionary modifications  
163 to iridophore morphogenesis or differentiation have contributed to overall pattern differences  
164 between species.

### 165 **Endothelin pathway mutants identify a candidate gene for the reduced melanophore** 166 **complement of *D. nigrofasciatus*.**

167 Shared phenotypes of laboratory induced mutants and other species identify candidate genes  
168 that may have contributed to morphological diversification [25,37,38]. *endothelin b1a receptor*  
169 (*ednrb1a*) mutant zebrafish resemble *D. nigrofasciatus* with deficiencies in iridophores and  
170 melanophores compared to wild-type *D. rerio*, and a pattern of stripes dorsally with spots  
171 ventrally. Prior genetic analyses failed to identify an obvious role for *ednrb1a* alleles in  
172 contributing to these species differences [37]. *Ednrb1a* is also expressed by pigment cells [34],  
173 whereas interspecific cell transplants suggested that pattern differences between *D. rerio* and *D.*  
174 *nigrofasciatus* likely result from differences in the tissue environment encountered by pigment  
175 cells [27]. Accordingly, we hypothesized that differences in expression of *Ednrb1a* ligand,  
176 Endothelin-3 (*Edn3*), contributes to the pigment pattern differences between these fishes. To  
177 first ascertain the phenotype of *Edn3* mutants of *D. rerio* we induced mutations in each of two  
178 *Edn3*-encoding loci of zebrafish, *edn3a* (chromosome 11) and *edn3b* (chromosome 23) (Figure  
179 S2).

180 Fish homozygous mutant for an inactivating allele of *edn3a* exhibited relatively normal stripes  
181 and interstripes, but were deficient for iridophores that normally line the peritoneum, resulting in  
182 a rosy cast to the ventrum (Figure 3). By contrast, each of three *edn3b* presumptive null alleles  
183 exhibited severe deficiencies of hypodermal iridophores and melanophores and patterns of  
184 stripes breaking into spots; similar to *D. nigrofasciatus*, none had defects in peritoneal  
185 iridophores (Figure S3).

186 *ednrb1a* mutants are defective for both hypodermal and peritoneal iridophores [34], suggesting  
187 that *Edn3* signaling may have been partitioned evolutionarily between the two paralogous,  
188 ligand-encoding loci. Consistent with this idea, fish doubly mutant for *edn3a* and *edn3b* were  
189 deficient for both types of iridophores and resembled mutants for *ednrb1a* (Figure 3). These  
190 observations also suggest that *Ednrb1a* need only interact with *Edn3a* and *Edn3b* ligands to  
191 fulfill requirements for adult pigmentation, though *Ednrb1* receptors of other vertebrate lineages  
192 are capable of transducing signals via other endothelins [29].



193 **Genetic analyses implicate *edn3b* in pattern difference between *D. rerio* and *D.***  
194 ***nigrofasciatus***

195 The similarity of *edn3b* mutant *D. rerio* and *D. nigrofasciatus*—with fewer hypodermal  
196 melanophores and iridophores than wild-type *D. rerio*, but persisting peritoneal iridophores—  
197 identified *edn3b* as a particularly good candidate for contributing to the species difference in  
198 pigmentation. To assess this possibility further we used an interspecific complementation test  
199 [37-39]. If a loss-of-function *edn3b* allele contributes to the reduced iridophores and  
200 melanophores of *D. nigrofasciatus* compared to *D. rerio*, we would expect that in hybrids of *D.*  
201 *rerio* and *D. nigrofasciatus*, substitution of a *D. rerio* mutant *edn3b* (*edn3b<sup>rerio-</sup>*) allele for a *D.*  
202 *rerio* wild-type *edn3b* (*edn3b<sup>rerio+</sup>*) allele should expose the “weaker” *D. nigrofasciatus* allele,  
203 reducing the complement of iridophores and melanophores. Such an effect should be of greater  
204 magnitude than substituting a mutant for wild-type allele in *D. rerio*, and should be detectable as  
205 an allele x genetic background interaction. We therefore generated crosses of *edn3b<sup>+</sup>* *D. rerio*  
206 x *D. nigrofasciatus* as well as *edn3b<sup>+</sup>* x *edn3b<sup>+</sup>* *D. rerio*. We grew offspring until juvenile  
207 pigment patterns had formed, then genotyped individuals of hybrid (h) or *D. rerio* (r)  
208 backgrounds for the presence of either *edn3b<sup>rerio+</sup>* or *edn3b<sup>rerio-</sup>*.

209 Hybrids between *D. rerio* and *D. nigrofasciatus* have patterns intermediate between the two  
210 species [37]. Figure 4A illustrates reduced coverage of iridophores and somewhat narrower  
211 stripes in fish carrying *edn3b<sup>rerio-</sup>* as compared to siblings carrying *edn3b<sup>rerio+</sup>*. Total areas  
212 covered by interstripe iridophores were significantly reduced in hybrids compared to *D. rerio*,  
213 overall, and in both backgrounds by substitution of *edn3b<sup>rerio-</sup>* for *edn3b<sup>rerio+</sup>* (Figure 4B).  
214 Moreover, hybrids were more severely affected by this substitution than were *D. rerio*, resulting  
215 in a significant allele x genetic background interaction. Melanophore numbers were also  
216 reduced by substitution of *edn3b<sup>rerio-</sup>* for *edn3b<sup>rerio+</sup>* but hybrids were not significantly more  
217 affected than *D. rerio* (Figure 4C). These analyses suggest that the wild-type *D. nigrofasciatus*  
218 *edn3b* allele is hypomorphic to the wild-type *D. rerio* allele of *edn3b*, and support a model in  
219 which evolutionary changes at *edn3b* have affected iridophore coverage between species.

220 Two other genes, *augmentor-a1a* and *augmentor-a1b*, encoding secreted ligands for Leukocyte  
221 tyrosine kinase (Ltk), promote iridophore development in *D. rerio* and together have a mutant  
222 phenotype resembling *D. nigrofasciatus* [40,41]. Iridophore coverage in hybrids carrying *D. rerio*  
223 mutant alleles of *augmentor-a1a* and *augmentor-a1b* did not differ from siblings carrying *D. rerio*  
224 wild-type alleles ( $F_{1,12}=0.01$   $P=0.9$ ;  $F_{1,11}=0.3$   $P=0.6$ ), highlighting specificity of the non-  
225 complementation phenotype observed for *edn3b*.

226 **Reduced *edn3b* expression in skin of *D. nigrofasciatus* compared to *D. rerio* owing to *cis-***  
227 **regulatory differences**

228 A hypomorphic allele of *edn3b* in *D. nigrofasciatus* could result from changes in protein  
229 sequence conferring diminished activity, or changes in regulation causing reduced Edn3b  
230 abundance. The inferred protein sequence of *D. nigrofasciatus* Edn3b did not have obvious  
231 lesions (e.g., premature stop codon, deletions or insertions), and the 21 amino acid mature  
232 peptide was identical between species.

233 We therefore asked whether *D. nigrofasciatus edn3b* might be expressed differently than the *D.*  
234 *rerio* allele. Presumably owing to low overall levels of expression, *edn3b* transcripts were not  
235 detectable by *in situ* hybridization, and transgenic reporters utilizing presumptive regulatory  
236 regions amplified by PCR (~5 kb) or contained within bacterial artificial chromosomes (~190 kb

237 containing ~105 kb upstream to the transcriptional start) failed to yield detectable fluorescence,  
238 precluding the assessment of spatial variation in gene expression. Nevertheless, quantitative  
239 RT-PCR on isolated skins of post-embryonic larvae indicated *edn3b* expression in *D.*  
240 *nigrofasciatus* at levels approximately one-quarter that of *D. rerio* (Figure 5A). Expression of  
241 *edn3b* was similarly reduced in the sister species of *D. nigrofasciatus*, *D. tinwini*, which has  
242 fewer melanophores and iridophores than *D. rerio*, and a spotted rather than striped pattern  
243 (Figure S4) [1,9].

244 This difference in *edn3b* expression raised the possibility that *cis*-regulatory factors (e.g,  
245 transcription factor binding sites, chromatin accessibility at *edn3b*) have been altered between  
246 *D. rerio* and *D. nigrofasciatus*. To test this idea, we compared expression of *D. rerio* and *D.*  
247 *nigrofasciatus edn3b* alleles in the common *trans*-regulatory background of *D. rerio* x *D.*  
248 *nigrofasciatus* hybrids. Allele-specific quantitative RT-PCR revealed approximately one-quarter  
249 the abundance of *D. nigrofasciatus edn3b* transcript compared to *D. rerio edn3b* transcript  
250 (Figure 5B). These observations suggest that species differences in *edn3b* result at least in part  
251 from *cis*-regulatory variation that drives lower levels of *edn3b* transcription in *D. nigrofasciatus*  
252 compared to *D. rerio*.

### 253 **Edn3b promotes increased iridophore coverage and secondarily affects melanophore** 254 **pattern in *D. nigrofasciatus***

255 If lower expression of *edn3b* contributes to the difference in pigment pattern between *D.*  
256 *nigrofasciatus* and *D. rerio*, then expressing *edn3b* at higher levels in *D. nigrofasciatus* should  
257 generate a pattern converging on that of *D. rerio*. To test this prediction, we constructed stable  
258 transgenic lines in both species to express *D. rerio* Edn3b linked by viral 2A sequence to  
259 nuclear-localizing Venus, driven by the ubiquitously expressed heat-shock inducible promoter of  
260 *D. rerio hsp70l* [16,23]. We then reared *D. rerio* and *D. nigrofasciatus* transgenic for  
261 *hsp70l:edn3b-2a-nlsVenus*, and their non-transgenic siblings, under conditions of repeated heat  
262 shock during adult pigment pattern formation.

263 Heat-shock enhanced expression of Edn3b increased iridophore coverage in *D. nigrofasciatus*  
264 as compared to *D. rerio* or non-transgenic siblings of either species (Figure 6A,E). Excess  
265 Edn3b failed to increase total numbers of melanophores in *D. nigrofasciatus* (Figure 6B).  
266 Nevertheless melanophores were differentially distributed in these fish, as *D. nigrofasciatus*  
267 overexpressing Edn3b had about twice as many cells localizing in a secondary ventral stripe  
268 (2V), and a correspondingly reduced number of cells in the primary ventral stripe (1V), as  
269 compared to control siblings (Figure 6D). In *D. rerio*, total melanophore numbers were increased  
270 by Edn3b overexpression though melanophore distributions were not differentially affected  
271 between its normally complete stripes (Figure 6B,C,E).

272 The rearrangement of a constant number of melanophores in *hsp70l:edn3b-2a-nlsVenus D.*  
273 *nigrofasciatus*, and a requirement for interactions between iridophores and melanophores  
274 during normal stripe formation in *D. rerio* [15,16,23], raised the possibility that Edn3b effects on  
275 melanophores might be largely indirect, and mediated through iridophores. If so, we predicted  
276 that in a background entirely lacking iridophores, *hsp70l:Edn3b* should fail to affect  
277 melanophore numbers or distribution. We therefore generated fish transgenic for *hsp70l:edn3b-*  
278 *2a-nlsVenus* and homozygous for a mutant allele of *leucocyte tyrosine kinase (ltk)*, which acts  
279 autonomously to promote iridophore development [15,40]. Consistent with iridophore-dependent  
280 Edn3b effects, neither melanophore numbers nor melanophore distributions differed between  
281 transgenic and non-transgenic siblings (Figure 6E, bottom panels).

282 These findings support a model in which lower expression of *edn3b* in *D. nigrofasciatus* results  
283 in diminished coverage by iridophores and a resulting failure of melanophores to more fully  
284 populate the secondary ventral stripe, as compared to *D. rerio*.

### 285 **Iridophore proliferation is curtailed in *D. nigrofasciatus* and *edn3b* mutant *D. rerio***

286 Finally, we sought to better understand the cellular bases for Edn3 effects on iridophore  
287 populations in *D. rerio* and *D. nigrofasciatus*. Given roles for Edn3 in promoting the proliferation  
288 of avian and mammalian neural crest cells and melanocytes [42-44], we hypothesized that  
289 *Danio* Edn3b normally promotes iridophore proliferation and we predicted that such proliferation  
290 would be curtailed in both *edn3b* mutant *D. rerio* and in *D. nigrofasciatus*.

291 To test these predictions, we examined iridophore behaviors by time-lapse imaging of larvae in  
292 which iridophores had been labeled mosaically with a *pnp4a:palm-mCherry* transgene. We  
293 detected iridophore proliferation in stripe regions, where these cells are relatively few and  
294 dispersed, and also within interstripes, where iridophores are densely packed (Figure 7).  
295 Proliferation of stripe-region iridophores was ~10-fold greater than that of interstripe iridophores.  
296 But within each region, iridophores of wild-type (*edn3b*+/+) *D. rerio* were more likely to divide  
297 than were iridophores of *edn3b* mutants. Iridophores of *D. nigrofasciatus* had a proliferative  
298 phenotype intermediate to those of wild-type and *edn3b* mutant *D. rerio*. We did not observe  
299 gross differences in the survival or migration of iridophores across genetic backgrounds. These  
300 findings are consistent with Edn3b-dependent differences in iridophore proliferation affecting  
301 pattern formation both within *D. rerio*, and between *D. rerio* and *D. nigrofasciatus*.

302

### 303 **Discussion**

304 Towards a fuller understanding of pigment pattern diversification, we have analyzed cellular and  
305 genetic bases for differences in adult pattern between *D. rerio* and *D. nigrofasciatus*. Our study  
306 uncovers evolutionary changes in iridophore behavior between these species, identifies  
307 endothelin signaling as a candidate pathway contributing to these changes, and provides new  
308 insights into the evolution of endothelin genes and functions.

### 309 **Evolution of iridophore behaviors and impact on pattern reiteration**

310 An important finding of our analyses is that evolutionary alterations in iridophore behavior can  
311 drive species differences in overall pattern. *D. rerio* and *D. nigrofasciatus* have relatively similar  
312 complements of iridophores during early stages of adult pattern formation, but the two species  
313 subsequently diverge from one another. In *D. rerio*, iridophore clone sizes expanded markedly  
314 as the fish grew and secondary and tertiary interstripes were added, whereas this expansion—  
315 and pattern element reiteration—were curtailed in *D. nigrofasciatus*. The difference in clonal  
316 expansion reflected, at least in part, differences in iridophore proliferation as revealed by time-  
317 lapse imaging.

318 Prior efforts documented the essential function of iridophores in promoting melanophore stripe  
319 reiteration [16,23]. Here, we showed that enhancing the iridophore complement of *D.*  
320 *nigrofasciatus* by Edn3b overexpression was sufficient to reallocate melanophores from a well-  
321 formed primary ventral stripe into an otherwise vestigial secondary ventral stripe, resulting in a  
322 pattern more like that of *D. rerio*. This effect was probably mediated by interactions between  
323 iridophores and melanophores, as melanophores did not respond to the same transgene in the  
324 *ltk* mutant of *D. rerio*, which lacks iridophores. An indirect role for endothelin signaling in



325 promoting melanophore stripe development has likewise been inferred from cell transplantation  
326 between wild-type and *ednrb1a* mutant *D. rerio* [15], despite expression of *ednrb1a* by newly  
327 differentiating melanophores [34] and a responsiveness of *D. rerio* melanoma cells to Edn3b in  
328 the absence of iridophores [45].

329 Our observations suggest that an early cessation of iridophore clonal expansion in *D.*  
330 *nigrofasciatus* has led to an earlier offset of interactions between iridophores and  
331 melanophores, and an attenuation of the stripe pattern in *D. nigrofasciatus*. In heterochronic  
332 terms, the *D. nigrofasciatus* patterns could thus be described as pedomorphic relative to an  
333 inferred ancestral state, and arising by progenesis, relative to overall somatic development [46].  
334 That a temporal change in the availability of interactions with iridophores has cascading effects  
335 on pattern is reminiscent of observations for xanthophores: precocious widespread xanthophore  
336 development, and resulting xanthophore–melanophore interactions, are associated with fewer  
337 stripes and more uniform pattern in *D. rerio* and *D. albolineatus* [23]. These outcomes highlight  
338 the diversity of patterns that can arise from a common set of cellular interactions in response to  
339 evolutionary modifications to the temporal or spatial pattern of pigment cell appearance.

#### 340 **A role for endothelin signaling in *Danio* pattern evolution**

341 The numerous pigment mutants of *D. rerio* might be expected to include genes that have  
342 contributed to evolutionary diversification within *Danio*, particularly when patterns of mutants  
343 and species resemble one another. We found that *edn3b* mutants of *D. rerio* have fewer  
344 iridophores and pattern elements than wild-type *D. rerio*, similar to the naturally occurring  
345 pattern of *D. nigrofasciatus*. This similarity of final phenotype was presaged by similarity of  
346 developmental phenotype, as both *edn3b* mutant *D. rerio* and *D. nigrofasciatus* had reduced  
347 iridophore proliferation relative to wild-type *D. rerio*.

348 Our study provides several lines of evidence to support a model in which alterations affecting  
349 Edn3b have contributed to the species difference in pigmentation. First, hybrids of *D. rerio* and  
350 *D. nigrofasciatus* carrying a mutant *D. rerio* allele of *edn3b* had a more severe iridophore  
351 deficiency than heterozygous *D. rerio* carrying the same mutant allele, suggesting that the *D.*  
352 *nigrofasciatus* wild-type allele is weaker than the *D. rerio* wild-type allele. Second, *edn3b*  
353 overexpression was sufficient to increase iridophore coverage, and (indirectly) alter  
354 melanophore distributions in *D. nigrofasciatus* to a state more similar to that of *D. rerio*. Third,  
355 we found reduced expression of *edn3b* in skin of *D. nigrofasciatus* compared to *D. rerio* during  
356 adult pigment pattern formation. Fourth, species differences in expression of *edn3b* alleles were  
357 re-capitulated even in a shared hybrid genetic background, pointing to evolutionary change in  
358 *cis*-regulation of this locus. Both *D. nigrofasciatus* and *D. tinwini* exhibited lower levels of *edn3b*  
359 expression compared to *D. rerio* so regulatory alteration(s) likely occurred prior to divergence of  
360 *D. nigrofasciatus* and *D. tinwini*, or within the lineage leading to *D. rerio* itself. *cis*-regulatory  
361 evolution affecting abundance of a secreted ligand that acts on pigment cells to affect pattern is  
362 similar to xanthogenic factor Csf1a of *Danio* [23], melanogenic Kit ligand of stickleback [47], and  
363 some aspects of anti-melanogenic Agouti in deer mice [48].

364 Our findings support a role for *edn3b* in *Danio* pattern evolution yet they also point to roles for  
365 additional factors. For example, overexpression of Edn3b in *D. nigrofasciatus* increased the  
366 coverage of iridophores and allowed for some rearrangements of melanophores, but failed to  
367 entirely recapitulate the pattern of *D. rerio*. Indeed, melanophore numbers were unchanged in  
368 transgenic *D. nigrofasciatus*, in contrast to the larger overall numbers of melanophore in wild-  
369 type *D. rerio* and the still larger number of melanophores induced indirectly by Edn3b

370 overexpression in *D. rerio* (Figure 6B). Thus, pigment pattern differences between these  
371 species are clearly polygenic, and it seems likely that additional loci, of the endothelin pathway  
372 or other pathways, will be identified as contributing to attenuated stripes and interstripes of *D.*  
373 *nigrofasciatus* compared to *D. rerio*.

374 The endothelin pathway has been implicated in naturally arising strain differences previously.  
375 Besides the spontaneous mutant alleles of mouse *Edn3* and *Ednrb* that allowed the pathway to  
376 be first characterized molecularly [49,50], endothelin pathway genes or differences in their  
377 expression have been associated with tabby coloration in domestic and wild cats [51],  
378 melanocyte deficiency in ducks [52], white and hyper-melanistic variants of chicken [53-55] and  
379 the white mutant axolotl [56]. It is tempting to speculate that mild alleles of endothelin pathway  
380 genes or alterations that affect their expression have relatively few pleiotropic effects,  
381 particularly in *Danio*, in which functions of *Edn3* paralogues have become subdivided between  
382 distinct classes of iridophores. Pigmentary phenotypes associated with this pathway may be  
383 particularly accessible targets for natural or artificial selection.

#### 384 **Evolution of endothelin genes and functions**

385 Finally, our investigation of *Edn3b* bears on our understanding of how the endothelin pathway  
386 and its functions have evolved. Endothelins were discovered for their roles in vasoconstriction  
387 and have since been identified to have a variety of functions [29]. In the context of pigmentation,  
388 endothelins and their receptors have been most extensively studied in mammals and birds, in  
389 which they regulate proliferation, migration, differentiation and survival at various points within  
390 the neural crest–melanocyte lineage [30,31,33]. In teleosts, our results in *Danio* suggest that  
391 *Edn3* acts primarily to promote iridophore development, with only indirect effects on  
392 melanophores. By contrast, the salamander *Ambystoma mexicanum* requires *edn3* for the  
393 development of melanophores, xanthophores and iridophores [56-58] and such effects are not  
394 plausibly mediated through iridophores, which develop long after the requirement by  
395 melanophores and xanthophores is first manifested.

396 In teleosts, an additional round of whole genome duplication has resulted in extra genes as  
397 compared to non-teleost vertebrates [59-61]. Though many duplicated genes have been lost,  
398 those having roles in pigmentation, including genes of the endothelin pathway have been  
399 differentially retained [28,29,62-64], presumably owing to the partitioning of ancestral functions  
400 and the acquisition of new functions. Our finding that *edn3a* and *edn3b* are required by  
401 complementary subsets of iridophores is consistent with subfunctionalization of an ancestral  
402 locus required by all iridophores.

403 Given requirements for *Edn3* in other species—and our findings in *Danio* that *edn3a* and *edn3b*  
404 are required by iridophores, *edn3b* is required only indirectly by melanophores, and neither  
405 locus is required by xanthophores—we can propose a model for functional evolution in which: (i)  
406 an ancestral vertebrate *Edn3* locus promoted the development of all three classes of pigment  
407 cells in ectotherms (a situation currently represented by *A. mexicanum*); (ii) loss of iridophores  
408 and xanthophores in mammals and birds obviated an *Edn3* role in these cell lineages; (iii) *Edn3*  
409 functional requirements became limited to iridophores in the lineage leading to teleost fishes  
410 and then were further partitioned between iridophore populations, at least in *Danio*. Further  
411 testing of this scenario will benefit from analyses of additional anamniotes, including gar, which  
412 diverged from the teleost lineage prior to the teleost genome duplication [61,65] and might be  
413 expected to have an *Edn3* requirement similar to that of *A. mexicanum*.

## 414 **Materials and Methods**

### 415 **Ethics statement**

416 All animal research was conducted according to federal, state and institutional guidelines and in  
417 accordance protocols approved by Institutional Animal Care and Use Committees at University  
418 of Washington, University of Virginia and University of Oregon. Anesthesia and euthanasia used  
419 MS-222.

### 420 **Fish stocks and rearing conditions**

421 Fish were reared under standard conditions (14L:10D at ~28 °C) and staging followed [14].  
422 *Danio rerio* were inbred wild-type WT(ABb), a derivative of AB\*. CRISPR/Cas9 mutants were  
423 induced in WT(ABb) (*edn3b<sup>vp.r30c1</sup>*) or ABC x TU (*edn3a<sup>b1282</sup>*, *edn3b<sup>b1283</sup>*). *Danio nigrofasciatus*  
424 was field-collected in Myanmar in 1998 [37] and maintained in the laboratory since that time.  
425 *Danio tinwini* was obtained from the pet trade in 2014. Transgenic lines *hsp70l:edn3b-2a-*  
426 *nlsVenus<sup>vp.rt30</sup>* and *hsp70l:edn3b-2a-nlsVenus<sup>vp.nt2</sup>* were generated in WT(ABb) and *D.*  
427 *nigrofasciatus* backgrounds, respectively. *augmentor-α1a/+* and *augmentor-α1b/+* *D. rerio* [41]  
428 were generously provided by E. Mo and S. Nicoli (Yale School of Medicine). *ltk<sup>js1</sup>* (*primrose*) is  
429 a spontaneous allele of *ltk* identified by S. Johnson, into which *hsp70l:edn3b-2a-nlsVenus<sup>vp.rt30</sup>*  
430 was crossed.

431 Fish were fed marine rotifers, brine-shrimp and flake food. Fish were allowed to spawn naturally  
432 or gametes were stripped manually for *in vitro* fertilization. Interspecific hybrids were generated  
433 by *in vitro* fertilization in both directions using *D. rerio* heterozygous for wild-type and  
434 *edn3b<sup>vp.r30c1</sup>* allele; progeny were reared through formation of juveniles patterns and then  
435 genotyped using primers to amplify *D. rerio* alleles by PCR from fin clips, followed by Sanger  
436 sequencing to identify carriers or WT(ABb) or *edn3b<sup>vp.r30c1</sup>* alleles. For *hsp70l*-inducible *Edn3b*  
437 transgenes, transgenic siblings and non-transgenic controls were reared from stages DR  
438 through J under conditions of repeated daily heat shock (38°C, 1 h) [16,23].

### 439 **CRISPR/Cas9 mutagenesis, transgenesis and clonal analyses**

440 For CRISPR/Cas9 mutagenesis, 1-cell stage embryos were injected with T7 guide RNAs and  
441 Cas9 protein (PNA Bio) using standard procedures [66]. Guides were tested for mutagenicity by  
442 Sanger sequencing and injected fish were reared through adult stages at which time they were  
443 intercrossed to generate heteroallelic F1s from which single allele strains were recovered.  
444 CRISPR gRNA targets (excluding proto-spacer adjacent motif) were: *edn3a<sup>b1282</sup>*,  
445 GCCAGCTCCTGAAACCCAC; *edn3b<sup>vp.r30c1</sup>*, GAGGATAAATGTACTACTG; *edn3b<sup>b1283</sup>*,  
446 GGATAAATGTACTACTGTG

447 For transgenesis, constructs were generated using the Tol2Kit and Gateway cloning [67] and  
448 injected by standard methods with *Tol2* transposase mRNA [68]. For *Edn3b*-containing  
449 transgenes, F0 mosaic adults were screened for germline transmission and progeny tested for  
450 *hsp70l*-induction of linked fluorophore. Clonal analyses used mosaic F0 larvae and limiting  
451 amounts of *pnp4a:palmeGFP* transgene to insure that integrations were rare between and  
452 within individuals so that only single clones were likely to be labeled [35,36]. Sparsity of  
453 transgene+ embryos and similarity of starting clone sizes within such embryos between species  
454 suggests that labeling was indeed clonal. Transgene+ individuals were imaged at stages PR+  
455 and J++.

## 456 Quantitative RT-PCR

457 For assessing *edn3b* transcript abundance across species, skins were harvested from stage-  
458 matched *D. rerio*, *D. nigrofasciatus* and *D. tinwini* and total RNAs isolated by Trizol  
459 (ThermoFisher) extraction as previously described [23]. First strand cDNAs were synthesized  
460 with iScript and oligo-dT priming (BioRad) and analyzed on an ABI StepOne Plus real time PCR  
461 instrument using custom designed Taqman probes against target sequence shared by *D. rerio*  
462 and *D. nigrofasciatus* (identical to *D. tinwini*). *edn3b* expression was normalized to that of  
463 *rpl13a*; normalization to a conserved *actb1* amplicon (ThermoFisher assay ID  
464 #Dr03432610\_m1) yielded equivalent results in pilot analyses (not shown). Expression levels  
465 were assessed using the  $2^{-\Delta\Delta Ct}$  method [69] with *D. rerio* expression levels set to 1.  
466 Comparisons of species differences in expression were repeated 4 times (with 2–4 biological  
467 replicates each) using matched stages of fish between DR+ and J. We did not detect significant  
468 differences between replicates/stages, or species x replicate/stage interactions, and so present  
469 normalized values across all replicates in the text. For analyzing allele-specific expression in  
470 hybrids, custom Taqman probes were designed to amplify an *edn3b* target from both species  
471 alleles, or from only *D. rerio* (*Dr*) or *D. nigrofasciatus* (*Dn*). Amplifications of *Dr* and *Dn* probes  
472 were normalized to that of the *Dr*, *Dn* probe. Hybrid samples included a total of 4 biological  
473 replicates. Primers (F, R) and target probes (T) were: *edn3b* (AIWR3Z6): F-  
474 CAGAGAATGTGTTTATTACTGTCATTTGGG, R-CCAAGGTGAACGTCCTCTCA, P-FAM-  
475 CTGGGATCAACACCCCAACG; *edn3b* (AI20TXP, *Dr*): F-TGGTGGTTCAGCAGTGTTG, R-  
476 TGTGAGCGTGTGATGCTGAA, P-FAM-CAAGCTTCGCTTCTTTC; *edn3b* (AI1RVRH, *Dn*): F-  
477 GCTCTTTTGCTAATTGTGAGTTTGGT, R-ACCAGAGAAGACTGGAGATGAGT, P-FAM-  
478 CTCCTGCACTTGAAAAC; *rpl13a* (*Dr*, *Dn*): F-CAGAGAATGTGTTTATTACTGTCATTTGGG, R-  
479 CCAAGGTGAACGTCCTCTCA, P-FAM-CTGGGATCAACACCCCAACG. Accession for *D.*  
480 *nigrofasciatus edn3b* is pending [submission #2127550].

## 481 Imaging

482 Images were acquired on: Zeiss AxioObserver inverted microscopes equipped either with  
483 Axiocam HR or Axiocam 506 color cameras or a Yokogawa laser spinning disk with Evolve  
484 camera, and an AxioZoom v16 stereomicroscope with Axiocam 506 color camera, all running  
485 ZEN blue software. An Olympus SZX12 stereomicroscope with Axiocam HRc camera and  
486 Axiovision software was additionally used for some imaging. Images were corrected for color  
487 balance and adjusted for display levels as necessary with all treatments or species within  
488 analyses treated identically. Images of swimming fish were captured with a Nikon D800 digital  
489 SLR equipped with Nikon AF-S VR Micro-Nikkor f2.8 IF/ED lens.

490 Counts of melanophores and coverage by iridophores used regions of interest defined dorsally  
491 and ventrally by the margins of the flank, anteriorly by the anterior insertion of the dorsal fin and  
492 posteriorly by the posterior insertion of the anal fin. Only hypodermal melanophores contributing  
493 to stripes were included in analyses; dorsal melanophores and melanophores on scales were  
494 not considered. For assessing iridophore coverage, total areas covered by dense interstripe  
495 iridophores were estimated as these account for the majority of total hypodermal iridophores  
496 and areas covered by sparse iridophores within stripe regions could not be reliably estimated  
497 from brightfield images. Cell counts and area determinations were made using ImageJ. Time-  
498 lapse analyses of iridophore behaviors followed [21] and were performed for 15 h with 5 min  
499 frame intervals on *D. nigrofasciatus* as well as *D. rerio* siblings homozygous or heterozygous for  
500 *edn3b<sup>vp.r30c1</sup>*. Individual genotypes of larvae used for time-lapse imaging were assessed by  
501 Sanger sequencing across the induced lesion.

502 **Statistical analysis**

503 All statistical analyses were performed using JMP 14.0.0 statistical analysis software (SAS  
504 Institute, Cary NC) for Apple Macintosh. For linear models residuals were examined for  
505 normality and homoscedasticity and variables transformed as necessary to meet model  
506 assumptions [70].

507

508 **Acknowledgements**

509 Supported by NIH R35 GM122471 to D.M.P. and NIH P01 HD22486 and NIH R25 HD070817 to  
510 J.S.E. Thanks to A. Schwindling and other Parichy lab members for technical assistance with  
511 experiments and fish rearing.

512



## 513 **References**

- 514 1. Parichy DM (2015) Advancing biology through a deeper understanding of zebrafish ecology  
515 and evolution. *Elife* 4: e05635.
- 516 2. Endler JA (1988) Sexual Selection and Predation Risk in Guppies. *Nature* 332: 593-594.
- 517 3. Rosenthal GG, Ryan MJ (2005) Assortative preferences for stripes in danios. *Animal*  
518 *Behaviour* 70: 1063-1066.
- 519 4. Engeszer RE, Wang G, Ryan MJ, Parichy DM (2008) Sex-specific perceptual spaces for a  
520 vertebrate basal social aggregative behavior. *Proc Natl Acad Sci U S A* 105: 929-933.
- 521 5. Price AC, Weadick CJ, Shim J, Rodd FH (2008) Pigments, patterns, and fish behavior.  
522 *Zebrafish* 5: 297-307.
- 523 6. Engeszer RE, Patterson LB, Rao AA, Parichy DM (2007) Zebrafish in the wild: a review of  
524 natural history and new notes from the field. *Zebrafish* 4: 21-40.
- 525 7. Tang KL, Agnew MK, Hirt MV, Sado T, Schneider LM, et al. (2010) Systematics of the  
526 subfamily Danioninae (Teleostei: Cypriniformes: Cyprinidae). *Mol Phylogenet Evol* 57: 189-214.
- 527 8. Arunachalam M, Raja M, Vijayakumar C, Malaiammal P, Mayden RL (2013) Natural history of  
528 zebrafish (*Danio rerio*) in India. *Zebrafish* 10: 1-14.
- 529 9. McCluskey BM, Postlethwait JH (2015) Phylogeny of Zebrafish, a "Model Species," within  
530 *Danio*, a "Model Genus". *Mol Biol Evol* 32: 635-652.
- 531 10. Dooley CM, Mongera A, Walderich B, Nusslein-Volhard C (2013) On the embryonic origin of  
532 adult melanophores: the role of *ErbB* and *Kit* signalling in establishing melanophore stem cells  
533 in zebrafish. *Development* 140: 1003-1013.
- 534 11. McMenamin SK, Bain EJ, McCann AE, Patterson LB, Eom DS, et al. (2014) Thyroid  
535 hormone-dependent adult pigment cell lineage and pattern in zebrafish. *Science* 345: 1358-  
536 1361.
- 537 12. Budi EH, Patterson LB, Parichy DM (2011) Post-embryonic nerve-associated precursors to  
538 adult pigment cells: genetic requirements and dynamics of morphogenesis and differentiation.  
539 *PLoS Genet* 7: e1002044.
- 540 13. Singh AP, Schach U, Nusslein-Volhard C (2014) Proliferation, dispersal and patterned  
541 aggregation of iridophores in the skin prefigure striped colouration of zebrafish. *Nat Cell Biol* 16:  
542 607-614.
- 543 14. Parichy DM, Elizondo MR, Mills MG, Gordon TN, Engeszer RE (2009) Normal table of  
544 postembryonic zebrafish development: staging by externally visible anatomy of the living fish.  
545 *Developmental Dynamics* 238: 2975-3015.
- 546 15. Frohnhof HG, Krauss J, Maischein HM, Nusslein-Volhard C (2013) Iridophores and their  
547 interactions with other chromatophores are required for stripe formation in zebrafish.  
548 *Development* 140: 2997-3007.
- 549 16. Patterson LB, Parichy DM (2013) Interactions with iridophores and the tissue environment  
550 required for patterning melanophores and xanthophores during zebrafish adult pigment stripe  
551 formation. *PLoS Genet* 9: e1003561.

- 552 17. Parichy DM, Turner JM (2003) Temporal and cellular requirements for Fms signaling during  
553 zebrafish adult pigment pattern development. *Development* 130: 817-833.
- 554 18. Nakamasu A, Takahashi G, Kanbe A, Kondo S (2009) Interactions between zebrafish  
555 pigment cells responsible for the generation of Turing patterns. *Proc Natl Acad Sci U S A* 106:  
556 8429-8434.
- 557 19. Hamada H, Watanabe M, Lau HE, Nishida T, Hasegawa T, et al. (2014) Involvement of  
558 Delta/Notch signaling in zebrafish adult pigment stripe patterning. *Development* 141: 318-324.
- 559 20. Mahalwar P, Walderich B, Singh AP, Nusslein-Volhard C (2014) Local reorganization of  
560 xanthophores fine-tunes and colors the striped pattern of zebrafish. *Science* 345: 1362-1364.
- 561 21. Eom DS, Bain EJ, Patterson LB, Grout ME, Parichy DM (2015) Long-distance  
562 communication by specialized cellular projections during pigment pattern development and  
563 evolution. *Elife* 4: e12401.
- 564 22. Eom DS, Parichy DM (2017) A macrophage relay for long-distance signaling during  
565 postembryonic tissue remodeling. *Science* 355: 1317-1320.
- 566 23. Patterson LB, Bain EJ, Parichy DM (2014) Pigment cell interactions and differential  
567 xanthophore recruitment underlying zebrafish stripe reiteration and *Danio* pattern evolution. *Nat*  
568 *Commun* 5: 5299.
- 569 24. McClure M (1999) Development and evolution of melanophore patterns in fishes of the  
570 genus *Danio* (Teleostei: Cyprinidae). *J Morphol* 241: 83-105.
- 571 25. Quigley IK, Manuel JL, Roberts RA, Nuckels RJ, Herrington ER, et al. (2005) Evolutionary  
572 diversification of pigment pattern in *Danio* fishes: differential fms dependence and stripe loss in  
573 *D. albolineatus*. *Development* 132: 89-104.
- 574 26. Quigley IK, Parichy DM (2002) Pigment pattern formation in zebrafish: a model for  
575 developmental genetics and the evolution of form. *Microsc Res Tech* 58: 442-455.
- 576 27. Quigley IK, Turner JM, Nuckels RJ, Manuel JL, Budi EH, et al. (2004) Pigment pattern  
577 evolution by differential deployment of neural crest and post-embryonic melanophore lineages in  
578 *Danio* fishes. *Development* 131: 6053-6069.
- 579 28. Braasch I, Brunet F, Volff JN, Schartl M (2009) Pigmentation pathway evolution after whole-  
580 genome duplication in fish. *Genome Biol Evol* 1: 479-493.
- 581 29. Braasch I, Schartl M (2014) Evolution of endothelin receptors in vertebrates. *Gen Comp*  
582 *Endocrinol* 209: 21-34.
- 583 30. Kelsh RN, Harris ML, Colanesi S, Erickson CA (2009) Stripes and belly-spots-A review of  
584 pigment cell morphogenesis in vertebrates. *Semin Cell Dev Biol* 20: 90-104.
- 585 31. Saldana-Caboverde A, Kos L (2010) Roles of endothelin signaling in melanocyte  
586 development and melanoma. *Pigment Cell Melanoma Res* 23: 160-170.
- 587 32. Hirobe T (2011) How are proliferation and differentiation of melanocytes regulated? *Pigment*  
588 *Cell Melanoma Res* 24: 462-478.
- 589 33. Mort RL, Jackson IJ, Patton EE (2015) The melanocyte lineage in development and  
590 disease. *Development* 142: 620-632.

- 591 34. Parichy DM, Mellgren EM, Rawls JF, Lopes SS, Kelsh RN, et al. (2000) Mutational analysis  
592 of endothelin receptor b1 (rose) during neural crest and pigment pattern development in the  
593 zebrafish *Danio rerio*. *Dev Biol* 227: 294-306.
- 594 35. Tu S, Johnson SL (2010) Clonal analyses reveal roles of organ founding stem cells,  
595 melanocyte stem cells and melanoblasts in establishment, growth and regeneration of the adult  
596 zebrafish fin. *Development* 137: 3931-3939.
- 597 36. Tryon RC, Johnson SL (2012) Clonal and lineage analysis of melanocyte stem cells and  
598 their progeny in the zebrafish. *Methods Mol Biol* 916: 181-195.
- 599 37. Parichy DM, Johnson SL (2001) Zebrafish hybrids suggest genetic mechanisms for pigment  
600 pattern diversification in *Danio*. *Dev Genes Evol* 211: 319-328.
- 601 38. Stern DL (2014) Identification of loci that cause phenotypic variation in diverse species with  
602 the reciprocal hemizyosity test. *Trends Genet* 30: 547-554.
- 603 39. Long AD, Mullaney SL, Mackay TF, Langley CH (1996) Genetic interactions between  
604 naturally occurring alleles at quantitative trait loci and mutant alleles at candidate loci affecting  
605 bristle number in *Drosophila melanogaster*. *Genetics* 144: 1497-1510.
- 606 40. Lopes SS, Yang X, Muller J, Carney TJ, McAdow AR, et al. (2008) Leukocyte tyrosine  
607 kinase functions in pigment cell development. *PLoS Genet* 4: e1000026.
- 608 41. Mo ES, Cheng Q, Reshetnyak AV, Schlessinger J, Nicoli S (2017) Alk and Ltk ligands are  
609 essential for iridophore development in zebrafish mediated by the receptor tyrosine kinase Ltk.  
610 *Proc Natl Acad Sci U S A* 114: 12027-12032.
- 611 42. Opdecamp K, Kos L, Arnheiter H, Pavan WJ (1998) Endothelin signalling in the  
612 development of neural crest-derived melanocytes. *Biochem Cell Biol* 76: 1093-1099.
- 613 43. Dupin E, Glavieux C, Vaigot P, Le Douarin NM (2000) Endothelin 3 induces the reversion of  
614 melanocytes to glia through a neural crest-derived glial-melanocytic progenitor. *Proc Natl Acad*  
615 *Sci U S A* 97: 7882-7887.
- 616 44. Hirobe T (2001) Endothelins are involved in regulating the proliferation and differentiation of  
617 mouse epidermal melanocytes in serum-free primary culture. *J Investig Dermatol Symp Proc* 6:  
618 25-31.
- 619 45. Kim IS, Heilmann S, Kansler ER, Zhang Y, Zimmer M, et al. (2017) Microenvironment-  
620 derived factors driving metastatic plasticity in melanoma. *Nat Commun* 8: 14343.
- 621 46. McKinney ML, McNamara KJ (1991) Heterochrony: the Evolution of Ontogeny. New York,  
622 New York: Plenum Press.
- 623 47. Miller CT, Beleza S, Pollen AA, Schluter D, Kittles RA, et al. (2007) cis-Regulatory changes  
624 in Kit ligand expression and parallel evolution of pigmentation in sticklebacks and humans. *Cell*  
625 131: 1179-1189.
- 626 48. Linnen CR, Poh YP, Peterson BK, Barrett RD, Larson JG, et al. (2013) Adaptive evolution of  
627 multiple traits through multiple mutations at a single gene. *Science* 339: 1312-1316.

- 628 49. Baynash AG, Hosoda K, Giaid A, Richardson JA, Emoto N, et al. (1994) Interaction of  
629 endothelin-3 with endothelin-B receptor is essential for development of epidermal melanocytes  
630 and enteric neurons. *Cell* 79: 1277-1285.
- 631 50. Hosoda K, Hammer RE, Richardson JA, Baynash AG, Cheung JC, et al. (1994) Targeted  
632 and natural (piebald-lethal) mutations of endothelin-B receptor gene produce megacolon  
633 associated with spotted coat color in mice. *Cell* 79: 1267-1276.
- 634 51. Kaelin CB, Xu X, Hong LZ, David VA, McGowan KA, et al. (2012) Specifying and sustaining  
635 pigmentation patterns in domestic and wild cats. *Science* 337: 1536-1541.
- 636 52. Li L, Li D, Liu L, Li S, Feng Y, et al. (2015) Endothelin Receptor B2 (EDNRB2) Gene Is  
637 Associated with Spot Plumage Pattern in Domestic Ducks (*Anas platyrhynchos*). *PLoS One* 10:  
638 e0125883.
- 639 53. Dorshorst B, Molin AM, Rubin CJ, Johansson AM, Stromstedt L, et al. (2011) A complex  
640 genomic rearrangement involving the endothelin 3 locus causes dermal hyperpigmentation in  
641 the chicken. *PLoS Genet* 7: e1002412.
- 642 54. Shinomiya A, Kayashima Y, Kinoshita K, Mizutani M, Namikawa T, et al. (2012) Gene  
643 duplication of endothelin 3 is closely correlated with the hyperpigmentation of the internal  
644 organs (Fibromelanosis) in silky chickens. *Genetics* 190: 627-638.
- 645 55. Kinoshita K, Akiyama T, Mizutani M, Shinomiya A, Ishikawa A, et al. (2014) Endothelin  
646 receptor B2 (EDNRB2) is responsible for the tyrosinase-independent recessive white (mo(w) )  
647 and mottled (mo) plumage phenotypes in the chicken. *PLoS One* 9: e86361.
- 648 56. Woodcock MR, Vaughn-Wolfe J, Elias A, Kump DK, Kendall KD, et al. (2017) Identification  
649 of Mutant Genes and Introgressed Tiger Salamander DNA in the Laboratory Axolotl,  
650 *Ambystoma mexicanum*. *Sci Rep* 7: 6.
- 651 57. Dushane GP (1934) The origin of pigment cells in Amphibia. *Science* 80: 620-621.
- 652 58. Dalton HC (1949) Developmental Analysis of Genetic Differences in Pigmentation in the  
653 Axolotl. *Proceedings of the National Academy of Sciences* 35: 277-283.
- 654 59. Amores A, Force A, Yan YL, Joly L, Amemiya C, et al. (1998) Zebrafish hox clusters and  
655 vertebrate genome evolution. *Science* 282: 1711-1714.
- 656 60. Dehal P, Boore JL (2005) Two rounds of whole genome duplication in the ancestral  
657 vertebrate. *PLoS Biol* 3: e314.
- 658 61. Braasch I, Gehrke AR, Smith JJ, Kawasaki K, Manousaki T, et al. (2016) The spotted gar  
659 genome illuminates vertebrate evolution and facilitates human-teleost comparisons. *Nat Genet*  
660 48: 427-437.
- 661 62. Braasch I, Schartl M, Volff JN (2007) Evolution of pigment synthesis pathways by gene and  
662 genome duplication in fish. *Bmc Evolutionary Biology* 7.
- 663 63. Braasch I, Volff JN, Schartl M (2009) The endothelin system: evolution of vertebrate-specific  
664 ligand-receptor interactions by three rounds of genome duplication. *Mol Biol Evol* 26: 783-799.

- 665 64. Lorin T, Brunet FG, Laudet V, Volf JN (2018) Teleost Fish-Specific Preferential Retention of  
666 Pigmentation Gene-Containing Families After Whole Genome Duplications in Vertebrates. *G3*  
667 (Bethesda) 8: 1795-1806.
- 668 65. Braasch I, Peterson SM, Desvignes T, McCluskey BM, Batzel P, et al. (2015) A new model  
669 army: Emerging fish models to study the genomics of vertebrate Evo-Devo. *J Exp Zool B Mol*  
670 *Dev Evol* 324: 316-341.
- 671 66. Shah AN, Davey CF, Whitebirch AC, Miller AC, Moens CB (2015) Rapid reverse genetic  
672 screening using CRISPR in zebrafish. *Nat Methods* 12: 535-540.
- 673 67. Kwan KM, Fujimoto E, Grabher C, Mangum BD, Hardy ME, et al. (2007) The Tol2kit: A  
674 multisite gateway-based construction kit for Tol2 transposon transgenesis constructs.  
675 *Developmental Dynamics* 236: 3088-3099.
- 676 68. Suster ML, Kikuta H, Urasaki A, Asakawa K, Kawakami K (2009) Transgenesis in zebrafish  
677 with the tol2 transposon system. *Methods Mol Biol* 561: 41-63.
- 678 69. Livak KJ, Schmittgen TD (2001) Analysis of relative gene expression data using real-time  
679 quantitative PCR and the 2(-Delta Delta C(T)) Method. *Methods* 25: 402-408.
- 680 70. Sokal RR, Rohlf FJ (1981) *Biometry*. New York, New York: W. H. Freeman and Company.
- 681 71. Hirata M, Nakamura K, Kanemaru T, Shibata Y, Kondo S (2003) Pigment cell organization  
682 in the hypodermis of zebrafish. *Dev Dyn* 227: 497-503.



683 **Figure 1. Different pigment patterns of *D. rerio* and *D. nigrofasciatus*.**

684 *Danio rerio* exhibit several dark stripes of melanophores with sparse iridophores, and light  
685 interstripes with abundant iridophores. *Danio nigrofasciatus* share common pattern elements but  
686 have fewer stripes and interstripes overall with spots forming ventrally instead of stripes. A shiny  
687 ventrum in both species results principally from iridophores that line the peritoneum, rather than  
688 iridophores in the hypodermis of the skin. Insets show iridescence of hypodermal iridophores.

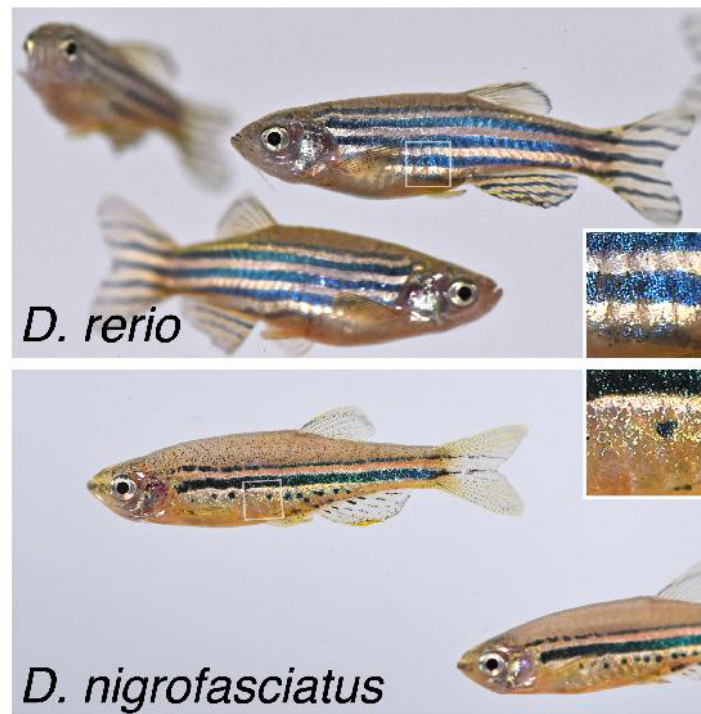

689 **Figure 2. Iridophore development differs between *D. rerio* and *D. nigrofasciatus*.**

690 (A) Young adult patterns of the two species, illustrating fewer melanophores of *D. nigrofasciatus*  
 691 compared to *D. rerio*. Stripes and interstripes are marked at the left. 1D, 1V: primary dorsal and  
 692 ventral stripes. 2V, secondary ventral stripe. I1, I2, I3: Primary, secondary and tertiary  
 693 interstripes. (B) Iridophores during primary stripe and secondary interstripe formation. Shown  
 694 are representative individuals imaged repeatedly for *D. rerio* (upper) and *D. nigrofasciatus*  
 695 (lower), with iridophores of the primary interstripe indicated by blue arrowheads. Fish were  
 696 imaged throughout adult pattern formation with stages PB through J [14] illustrated here  
 697 (corresponding to days ~14 through 38 post fertilization, shown for heuristic purposes only).  
 698 Insets show iridophores at higher magnification. In *D. rerio*, iridophores are  
 699 comparatively few, do not as extensively populate the region of the secondary ventral stripe or  
 700 the secondary ventral interstripe (blue arrow in *D. rerio*). Melanophores of the primary ventral  
 701 stripe occur more ventrally than in *D. rerio* and tended to be more closely associated with  
 702 vertical myosepta (marked by red asterisks). Sample sizes (*N*): 9 *D. rerio*; 6 *D. nigrofasciatus*.  
 703 (C) Clonally related iridophores increased in number in both species between formation of  
 704 primary interstripe (left; stage PB+) and subsequent pattern reiteration (right; J+). Points  
 705 connected by lines represent individual at each developmental stage. Starting numbers were  
 706 not significantly different ( $F_{1,10}=0.94$ ,  $P=0.4$ ), whereas final numbers were significantly fewer in  
 707 *D. nigrofasciatus* than in *D. rerio* (repeated measures, species x stage interaction,  $F_{1,10}=7.47$ ,  
 708  $P<0.05$ ;  $N=5$  *D. rerio*,  $N=6$  *D. nigrofasciatus*).

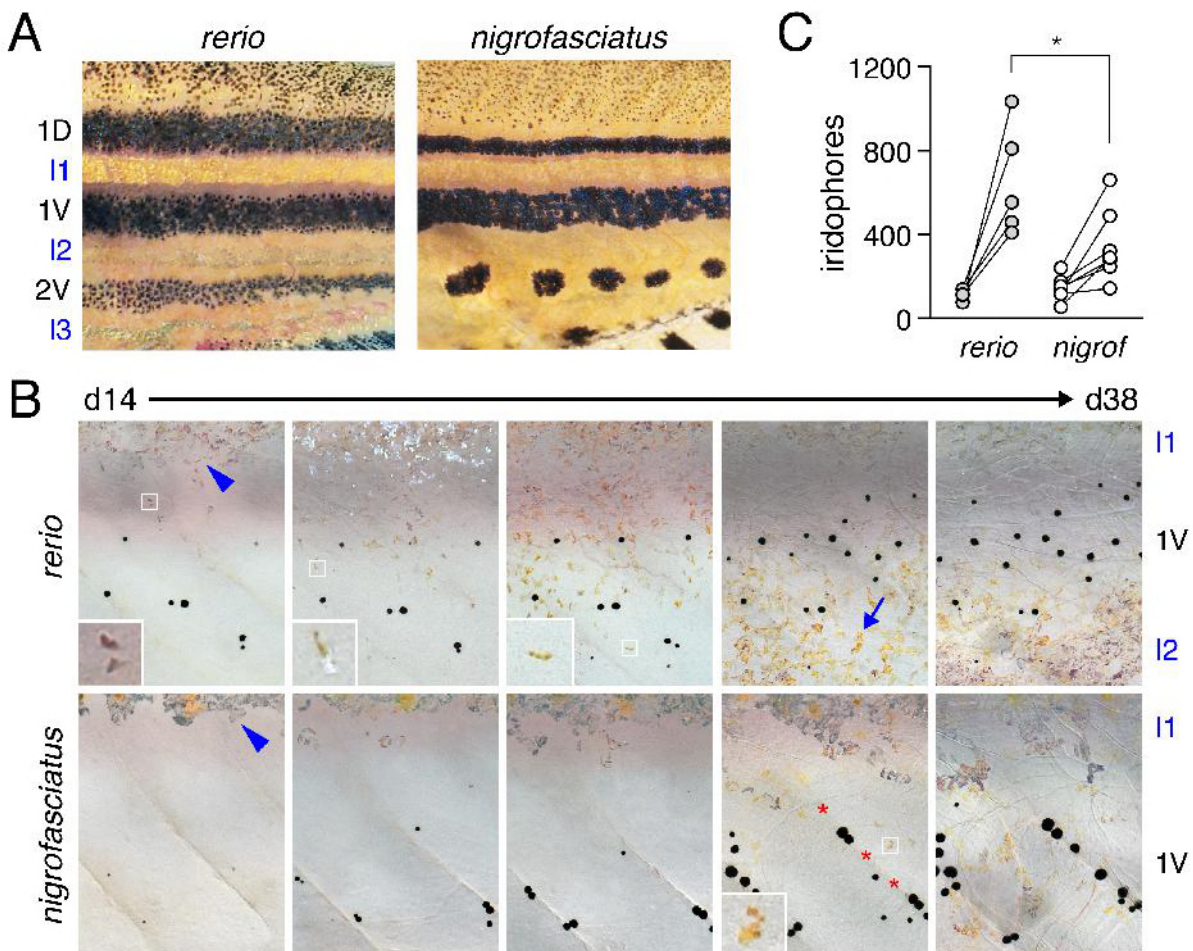

709 **Figure S1. Expansion of iridophore clones differs between *D. rerio* and *D. nigrofasciatus*.**

710 Representative images for individuals of each species mosaic for iridophore reporter  
711 *pnp4a:palmsEGFP* at an early stage of pattern formation, and a late stage, once patterns were  
712 complete. Dashed yellow lines indicate approximate regions of correspondence between early  
713 and late images and I1–I3 indicate primary through tertiary interstripes, if present; 1D, 1V, 2V  
714 indicate positions of stripes, if present. In each species, iridophores were present within  
715 interstripes, where they were densely packed, and within stripe, where they were loosely  
716 arranged. Inset 1, clonal derived early iridophores in primary interstripe of *D. rerio*. Inset 2, In  
717 some individuals, autofluorescent xanthophores (x) were apparent but were distinguishable from  
718 iridophores by differences in shape. Inset 3, early iridophores of *D. nigrofasciatus*. Inset 4,  
719 Examples of spindle-shaped “type-L” iridophores [71] present at low abundance in each  
720 species.

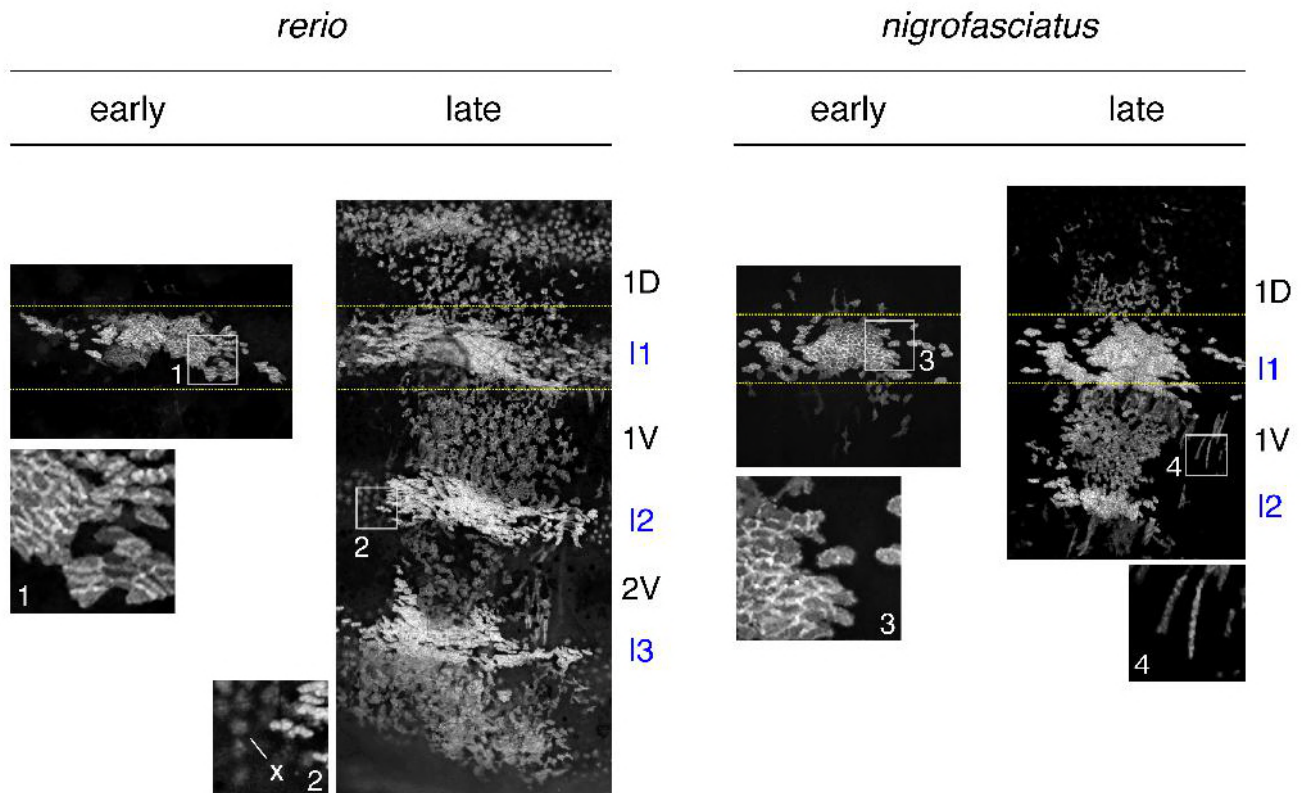



721 **Figure S2. Induced mutations in *D. rerio* Edn3 loci.**

722 Panels show genomic structures of Edn3 loci with locations encoding the mature peptides  
 723 (green) as well as local nucleotide and amino acid sequences. Untranslated regions are shown  
 724 in brown. For *edn3a*, the *b1282* allele has a 43 bp deletion that removes 13 of 20 amino acids  
 725 comprising the active Edn3a peptide, with the addition of 4 novel amino acids (red). For *edn3b*,  
 726 two alleles were generated with deletions of existing nucleotides and insertion of new  
 727 nucleotides (red) covering the splice donor site downstream of exon 2 (boxed), resulting in the  
 728 addition of novel amino acids and premature stop codons (\*). Both *vp.r30c1* and *b1283* are  
 729 likely to be loss-of-function mutations as their phenotypes were indistinguishable and also  
 730 resembled independently derived *edn3b* alleles having similar lesions at the same target site  
 731 [45]. Open reading frames are in upper case and intronic sequence in lower case.

*D. rerio edn3a*

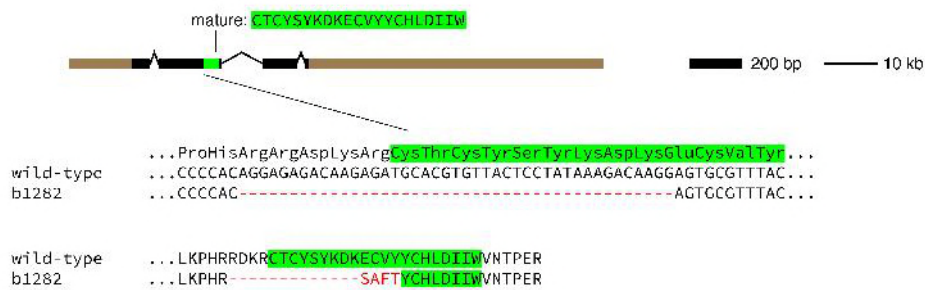

*D. rerio edn3b*

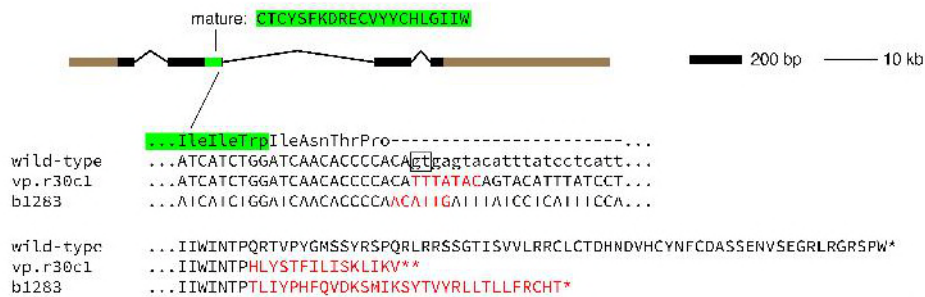

732 **Figure 3. Edn3 and Ednrb1a mutants of *D. rerio*.**

733 Shown are wild-type (wt) and homozygous mutants for *edn3a* and *edn3b*, double mutant *edn3a*;  
734 *edn3b*, and *ednrb1a*. *edn3a* mutants had normal hypodermal pigment pattern, including  
735 iridophore interstripes (arrow, right) but lacked peritoneal iridophores (arrowhead). *edn3b*  
736 mutants had hypodermal iridophore and melanophore deficiencies but normal peritoneal  
737 iridophores. Fish doubly mutant for these loci exhibited both defects and resembled *ednrb1a*  
738 mutants.

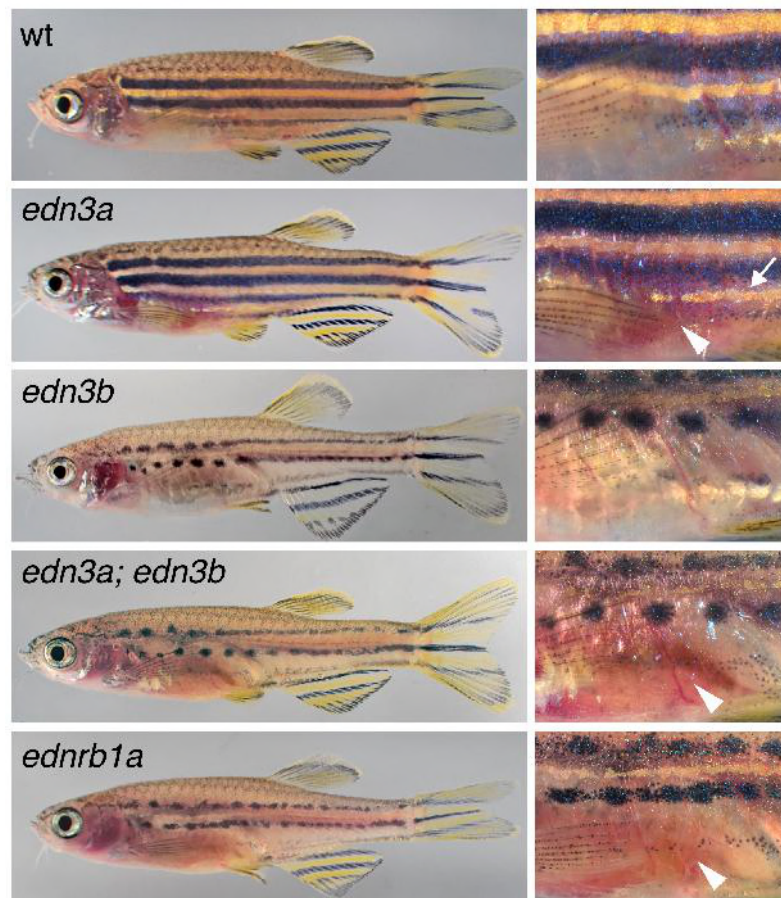



739 **Figure S3. Pigment pattern defects of *edn3b* mutants but not *edn3a* mutants resemble *D.***  
740 ***nigrofasciatus*.**

741 (A) Details of ventral patterns illustrating deficiency in peritoneal iridophores (arrowhead) in *D.*  
742 *rerio edn3a* mutants but not *edn3b* mutants or *D. nigrofasciatus*. (B) Defects in areas covered  
743 by iridophores and numbers of melanophores in heterozygous and homozygous *edn3b* mutant  
744 *D. rerio* ( $F_{2,48}=292.6$ ,  $F_{2,48}=69.8$ , respectively; both  $P<0.0001$ ). Shown are least squares  
745 means $\pm$ SE after controlling for variation in standard length (SL; both  $P<0.0001$ ). Different letters  
746 above bars indicate means significantly different in Turkey-Kramer post hoc comparisons.  
747 Values above bars indicate samples sizes.

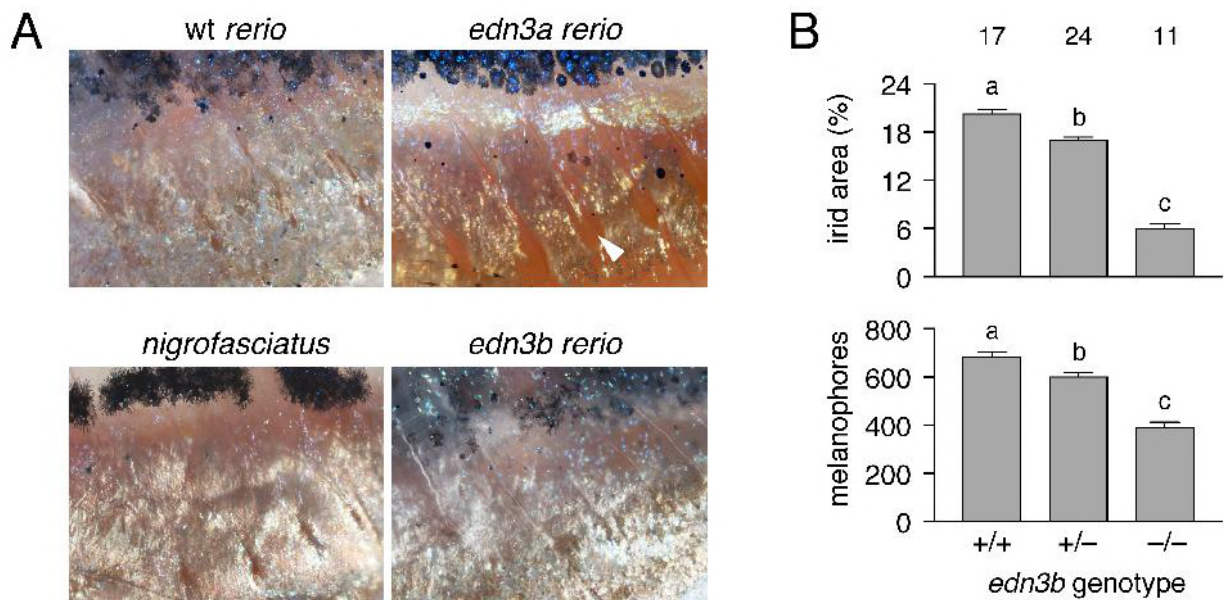

748 **Figure 4. Hypomorphic *edn3b* allele in *D. nigrofasciatus* relative to *D. rerio*.**

749 (A) Interspecific hybrids carrying either *D. rerio* wild-type *edn3b* allele (left) or mutant *edn3b*  
750 allele (right). Carriers of the mutant allele tended to have narrower stripes and reduced  
751 iridophore coverage overall. (B) Hybrids (h) had reduced coverage by dense iridophores of  
752 interstripes (total percent of flank) compared to *D. rerio* (*r*) overall ( $F_{1,59}=21.7$ ,  $P<0.0001$ ).  
753 Iridophore coverage was also reduced by substitution of a *D. rerio* *edn3b* mutant allele (–) for  
754 the *D. rerio* wild-type allele (+;  $F_{1,59}=101.6$ , respectively; both  $P<0.0001$ ), but this effect was  
755 more pronounced in hybrids, resulting in a significant background x allele interaction ( $F_{1,59}=6.5$ ,  
756  $P<0.05$ ; double headed arrow, different slopes). (C) Numbers of hypodermal melanophores  
757 were affected by background and *D. rerio* allele ( $F_{1,61}=23.5$ ,  $F_{1,61}=24.7$ , respectively; both  
758  $P<0.0001$ ), but a background x allele interaction was non-significant ( $F_{1,59}=1.0$ ,  $P=0.3$ ). Plots  
759 show least squares means $\pm$ SE after controlling for significant effects of SL ( $P<0.05$ ,  $P<0.0001$ ,  
760 respectively). Sample sizes (*N*): 17 *D. rerio* (+); 24 *D. rerio* (–); 10 hybrids (+); 13 hybrids (–).

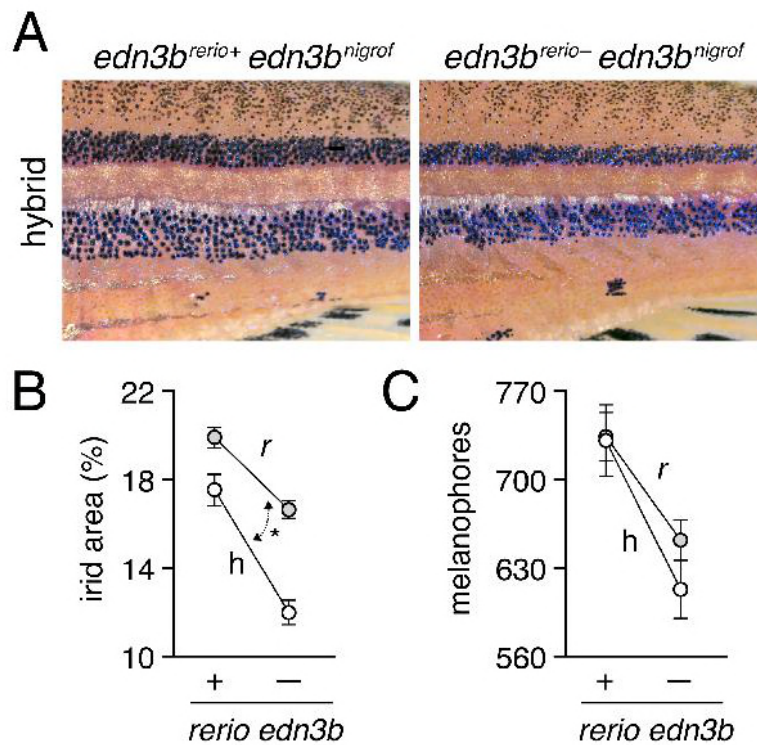

761 **Figure 5. Lower expression of *D. nigrofasciatus edn3b* relative to *D. rerio edn3b*.**

762 (A) *edn3b* was expressed at lower levels in skin of *D. nigrofasciatus* than *D. rerio* ( $F_{1,29}=48.6$ ,  
763  $P<0.0001$ ) during adult pattern formation. (B) In hybrid fish, *D. nigrofasciatus edn3b* alleles were  
764 expressed at lower levels than *D. rerio edn3b* alleles (paired  $t_3=4.6$ ,  $P<0.05$ ). Shown are  
765 means $\pm$ SE. Values within bars indicate sample sizes.

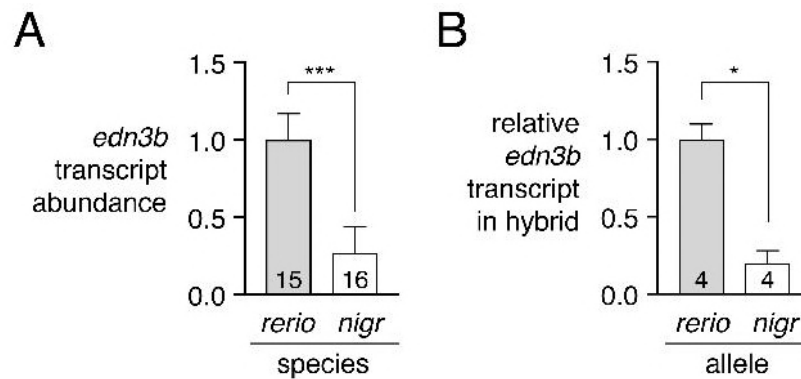

766 **Figure S4. Reduced *edn3b* expression in *D. tinwini* compared to *D. rerio*.**

767 (A) Phylogenetic relationships [9] and pattern of *D. tinwini*. (B) Species differences in skin *edn3b*  
768 expression during adult pattern development ( $F_{2,7}=48.2$ ,  $P<0.0001$ ). Shared letters indicate bars  
769 not significantly different in post hoc Turkey HSD comparisons of means ( $P>0.05$ ). Numbers in  
770 bars indicate biological replicates.

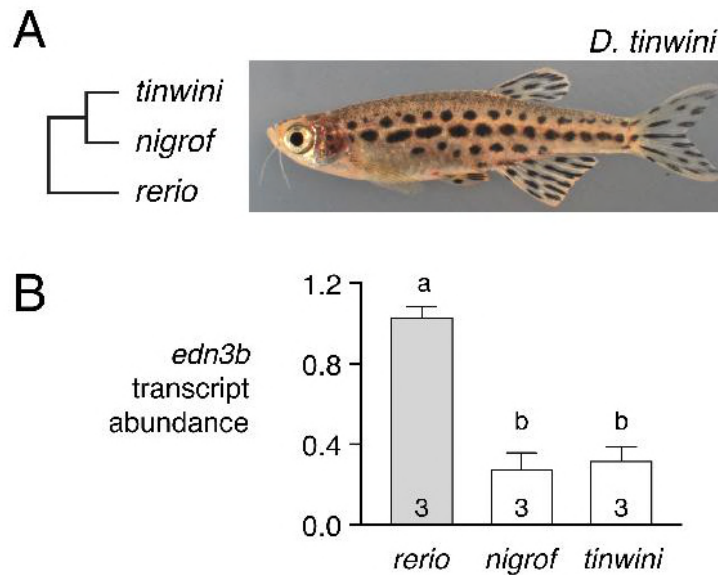

771 **Figure 6. Edn3b increases iridophore coverage in both species and affects melanophore**  
 772 **distribution indirectly in *D. nigrofasciatus*.**

773 (A) In both *D. rerio* (*r*) and *D. nigrofasciatus* (*n*), relative areas of the flank covered by interstripe  
 774 (dense) iridophores was increased in response to Edn3b overexpression (+++) as compared to  
 775 non-transgenic (-) sibling controls treated identically. The response to Edn3b overexpression  
 776 was more pronounced in *D. nigrofasciatus* than in *D. rerio* (species x transgene interaction,  
 777  $F_{1,55}=26.49$ ,  $P<0.0001$ ; double headed arrow, different slopes) (B) Edn3b overexpression  
 778 increased total numbers of hypodermal melanophores in *D. rerio* but not *D. nigrofasciatus*  
 779 (species x transgene interaction,  $F_{1,55}=4.7$ ,  $P<0.05$ ). (C,D) Distributions of melanophores in  
 780 ventral primary (1V) and ventral secondary (2V) stripes of *D. rerio* (C) and *D. nigrofasciatus*. In  
 781 *D. nigrofasciatus*, Edn3b overexpression did not increase the total numbers of melanophores in  
 782 these stripes ( $F_{1,28}=0.4$ ,  $P=0.5$ ) but did result in a reallocation of melanophores from 1V to 2V  
 783 (paired comparison within individuals, stripe position x transgene interaction ( $F_{1,26}=71.0$ ,  
 784  $P<0.0001$ ). All plots shows means $\pm$ SE. (E) Top and middle panels, Phenotypes of each species  
 785 with and without Edn3b overexpression. Lower panels, Iridophore-free *ltk* mutant *D. rerio* in  
 786 which Edn3b overexpression did not affect the numbers of melanophores ( $F_{1,27}=1.5$ ,  $P=0.2$ ) or  
 787 their allocation between regions (paired comparison within individuals, stripe position x  
 788 transgene interaction,  $F_{1,27}=1.5$ ,  $P=0.2$ ). Sample sizes (*N*): 15 *D. rerio* (-); 15 *D. rerio* (+++); 15  
 789 *D. nigrofasciatus* (-); 15 *D. nigrofasciatus* (+++); 15 *ltk* mutant *D. rerio* (-); 15 *ltk* mutant *D. rerio*  
 790 (+++).

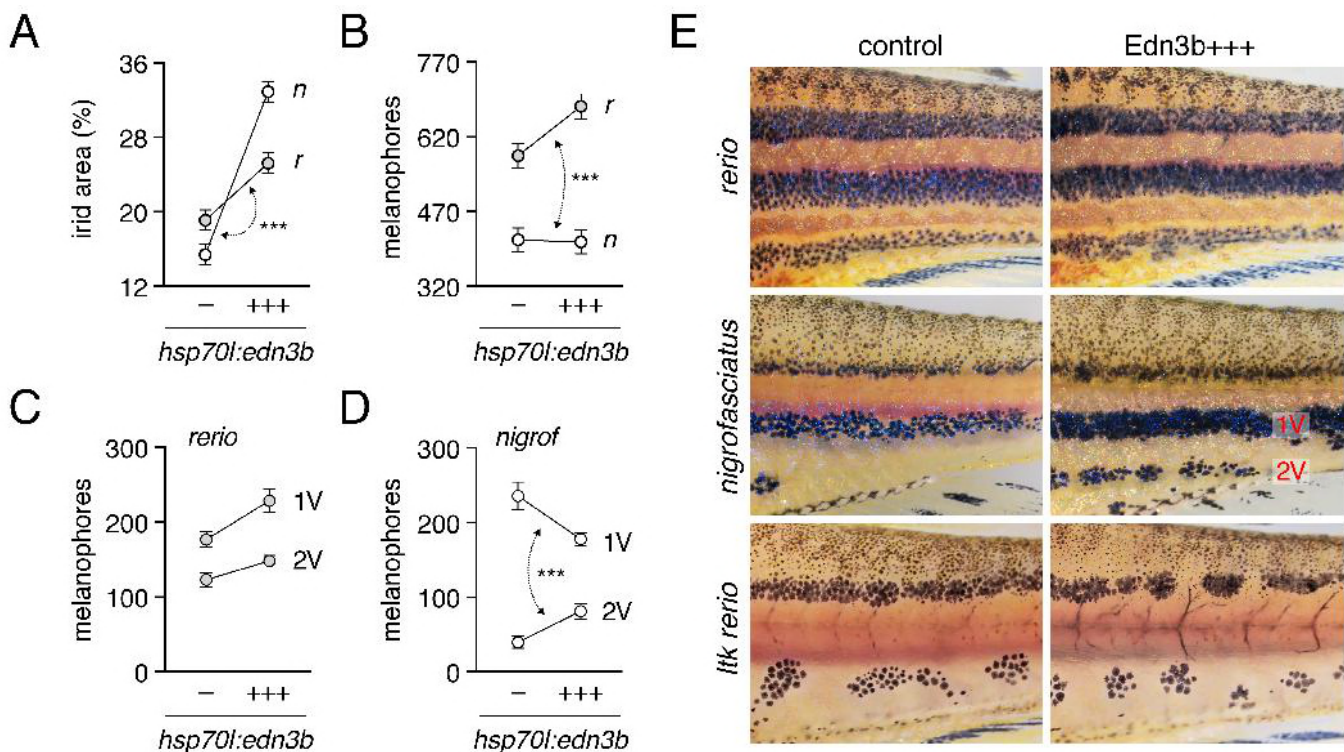



791 **Figure 7. Reduced iridophore proliferation in *edn3b* mutant *D. rerio* and *D. nigrofasciatus*.**

792 (A) Among loosely organized iridophores of prospective stripe regions, the percent of individual  
793 cells dividing during time-lapse imaging (15 h total duration) was greatest in *edn3l+* (wt) *D. rerio*  
794 and markedly reduced in sibling *edn3b* mutant *D. rerio* as well as *D. nigrofasciatus* (logistic  
795 regression: genotype,  $\chi^2=77.5$ , d.f.=2,  $P<0.0001$ ; SL,  $\chi^2=77.6$ , d.f.=1,  $P<0.0001$ ). (B) These  
796 same trends were evident for densely arranged iridophores of interstripes, though proliferation  
797 overall was reduced in comparison to stripe iridophores (genotype,  $\chi^2=13.7$ , d.f.=1,  $P<0.005$ ;  
798 SL,  $\chi^2=31.9$  d.f.=1  $P<0.0001$ ). Values above bars indicate total numbers of iridophores  
799 examined. Preliminary analysis did not reveal significant variation among individual larvae, the  
800 cells of which were pooled for final analyses (larval numbers: 8 *edn3l+* *D. rerio*; 8 *edn3b* mutant  
801 *D. rerio*; 9 *D. nigrofasciatus*). Different letters above bars indicate genotypes that differed  
802 significantly from one another in pairwise comparisons of odds ratios (all  $P<0.005$ ). (C) Stills  
803 from time-lapse video illustrating a single iridophore (arrowhead) within a prospective stripe  
804 region that partially rounds up by 120 min and then divides.

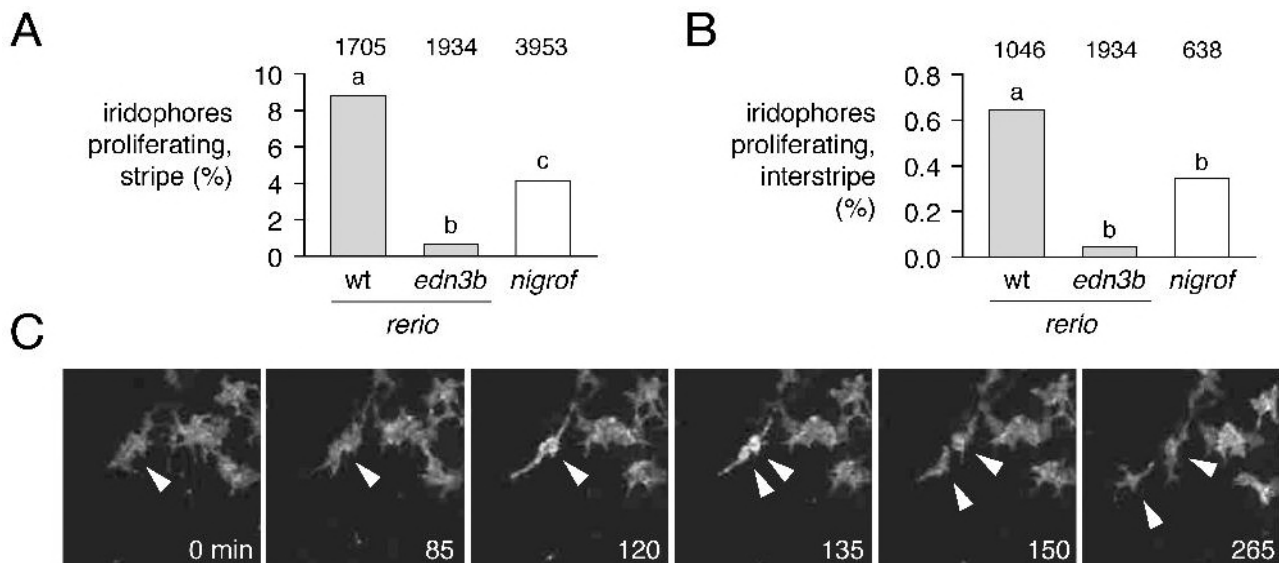

Source: http://biorxiv.org/content/10.1101/363879v1.full.pdf
